# Supplementary material
Source: publisher site journal article supplement (https://static.cambridge.org/content/id/urn:cambridge.org:id:article:S0962728600008873/resource/name/Maschat_et_al,_Appendix_Figure1.pdf)
Supplement: Supplementary file 1 [file Maschat_et_al,_Appendix_Figure1.pdf]

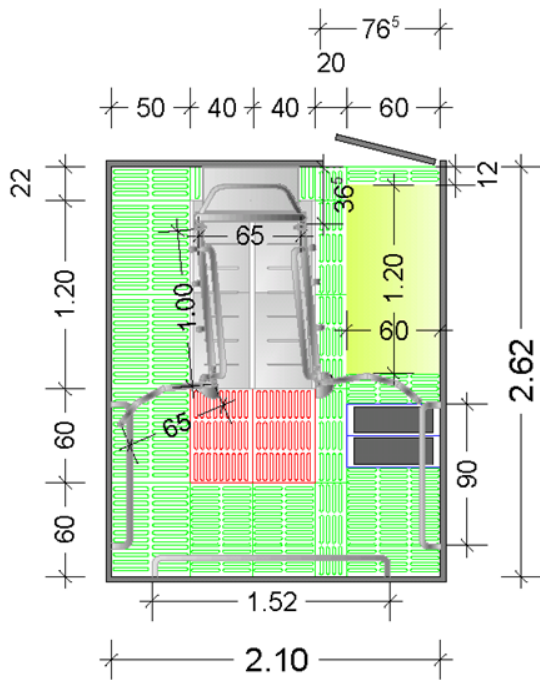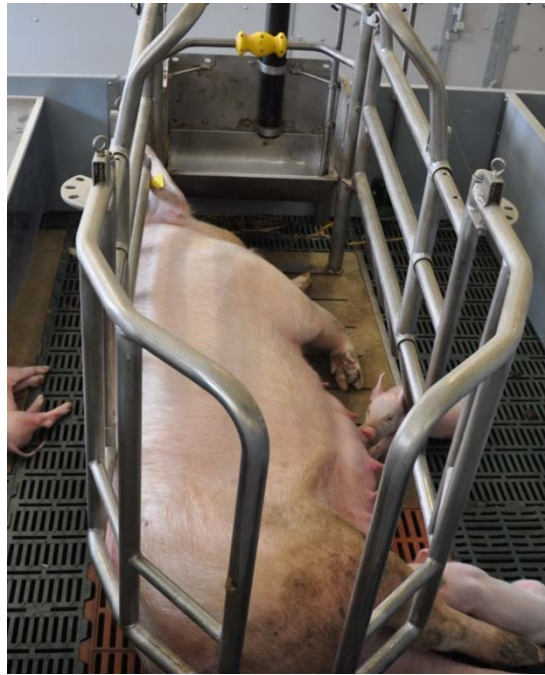

Figure 1: Flügel pen (STEWA Steinhuber GmbH, Sattledt, Austria): plan of pen with open crate and photograph of sow in closed crate. Farrowing crate with rear end cantilevered and equipped with flexible wings for crating the sow, side elements modifiable in width and length (telescopic design). Lowest bars (distance to floor: 0.35 m) of side elements equipped with diagonally arranged pins directed towards the sides. Flooring: solid concrete floor in the creep area (light green), minimally slatted (max. 5% perforation) concrete floor in front of the trough (light grey), cast iron slatted floor (red), plastic slatted floor (dark green) and solid plastic floor (dark grey). Farrowing rails in the back area of the pen.
